# Supplementary material for: Oligothiophenes incorporated in a polysilsesquioxane network: application to tunable transparent conductive films
Source: Royal Society of Chemistry journal article supplement (doi:10.1039/c2jm32259e), 2012-01-01
Supplement: c2jm32259e.pdf [file c2jm32259e.pdf]

Electronic Supplementary Information (ESI)

**Oligothiophenes Incorporated in Polysilsesquioxane Network:  
Application to Tunable Transparent Conductive Films**

*Ichiro Imae\**, *Daisuke Tokita*, *Yousuke Ooyama*, *Kenji Komaguchi*,  
*Joji Ohshita*, and *Yutaka Harima\**

Department of Applied Chemistry, Graduate School of Engineering,  
Hiroshima University

E-mail: [imaie@hiroshima-u.ac.jp](mailto:imaie@hiroshima-u.ac.jp) (I.I.); [harima@mls.ias.hiroshima-u.ac.jp](mailto:harima@mls.ias.hiroshima-u.ac.jp) (Y.H.)

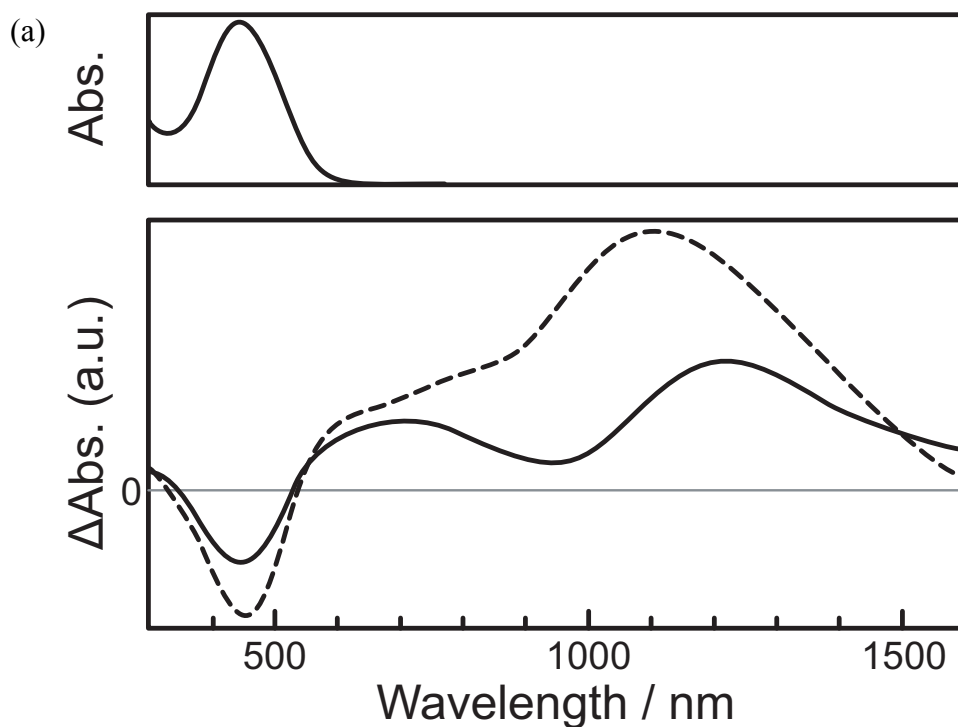

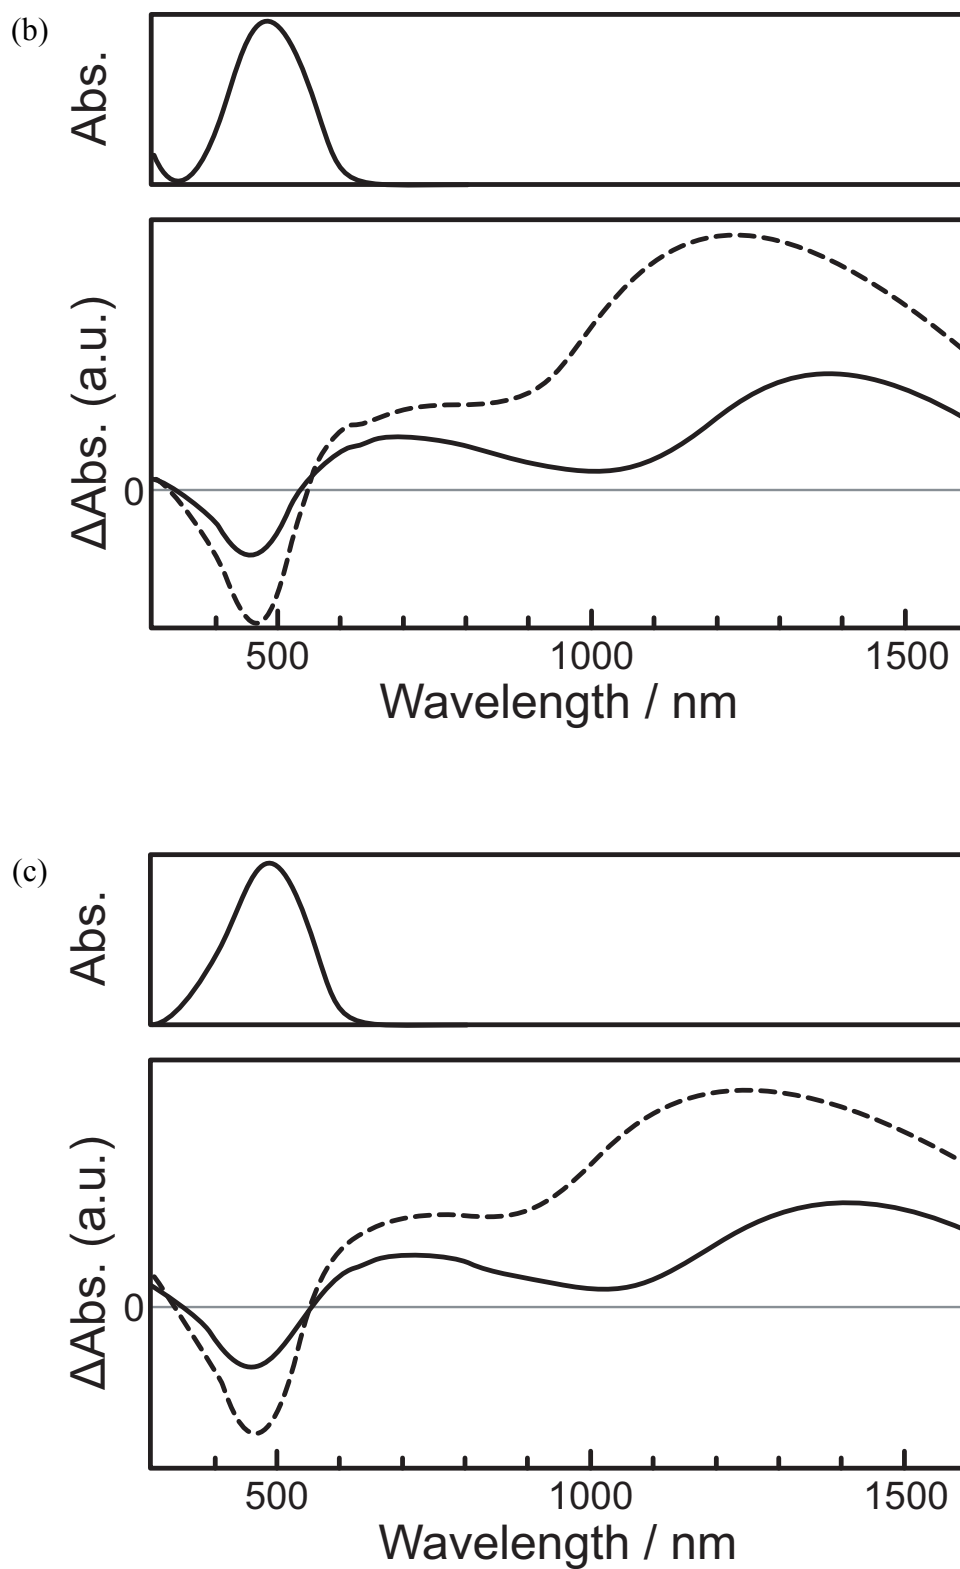

**Fig. 1** Absorption spectra of (a) **PBSO8T**, (b) **PBSO10T**, and (c) **PBSO12T** films (upper: spectra of neutral polymers, bottom: difference spectra of electrochemically oxidized polymers; solid: oxidized at 0.5 V for **PBSO8T** and/or 0.4 V for **PBSO10T** and **PBSO12T**, dashed: oxidized at 0.8 V vs. Ag/Ag<sup>+</sup> for all polymers).
